# Supplementary material
Source: Royal Society of Chemistry journal article supplement (doi:10.1039/d6ta02355j)
Supplement: d6ta02355j1.pdf [file d6ta02355j1.pdf]

*Supporting Information for*

**Phosphate Buffer-Induced Depletion of Nickel Redox Sites Limits Oxygen Evolution on Stainless Steel Anodes**

Kiho Nishioka<sup>a\*</sup>, Sakino Hiro<sup>a</sup>, and Kuniaki Murase<sup>a\*</sup>

<sup>a</sup>Department of Materials Science and Engineering, Kyoto University, Sakyo-ku, Kyoto 606-8501, Japan

*\*Address correspondence to:* nishioka.kiho.2h@kyoto-u.ac.jp, murase.kuniaki.2n@kyoto-u.ac.jp

## Supporting Tables and Figures

**Table S1** Physical properties of the electrolytes used in this study at 25 °C.

|                                                | Conductivity / S m <sup>-1</sup> | Viscosity / mPa s |
|------------------------------------------------|----------------------------------|-------------------|
| 1 M KOH <sup>[1]</sup>                         | 26.7                             | -                 |
| 0.2 M K <sub>2</sub> HPO <sub>4</sub> (pH11.5) | 3.47                             | 1.15              |
| 1 M K <sub>2</sub> HPO <sub>4</sub> (pH11.5)   | 12.1                             | 1.52              |
| 3 M K <sub>2</sub> HPO <sub>4</sub> (pH11.5)   | 20.0                             | 3.22              |

**Table S2** Atomic fractions (at.%) determined by EDX analyses for a pristine bulk 304 SS sheet and a QCM-type 304 SS electrode.

|    | Bulk SS | QCM-type SS |
|----|---------|-------------|
| Fe | 65.73   | 64.26       |
| Cr | 16.68   | 16.37       |
| Ni | 8.59    | 7.31        |
| Al | 6.93    | 9.82        |
| Mn | 1.88    | 1.41        |

**a**

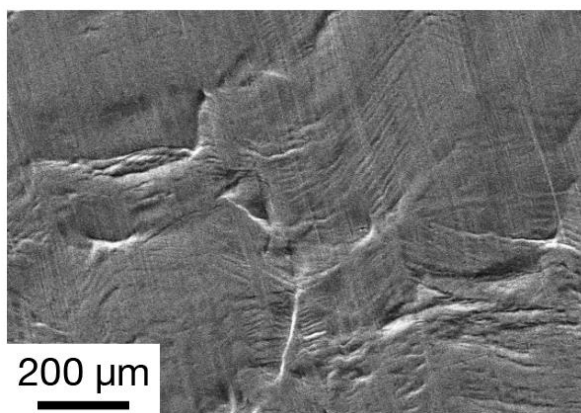

**b**

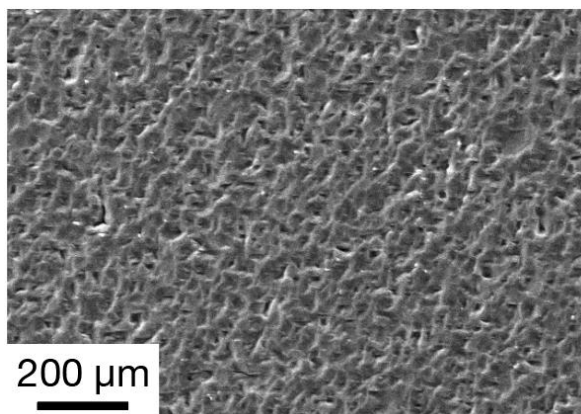

**Figure S1.** SEM images of pristine (a) bulk 304 SS sheet and (b) QCM-type 304 SS electrodes.

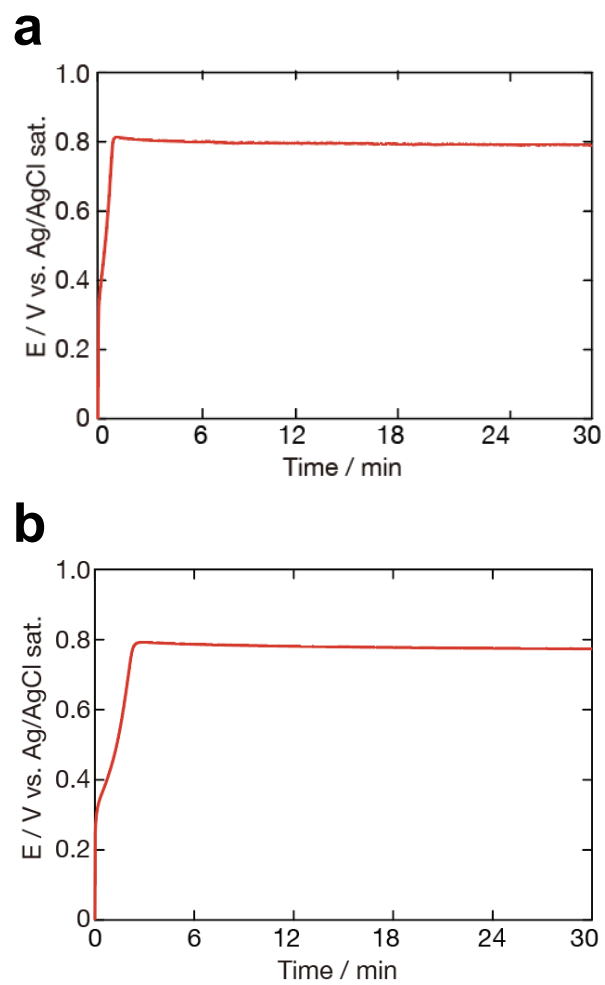

**Figure S2.** Time–potential curves recorded during galvanostatic electrolysis at  $100 \mu\text{A cm}^{-2}$  using (a) bulk 304 SS and (b) QCM-type 304 SS electrodes in 1 M  $\text{K}_2\text{HPO}_4$  (pH11.5).

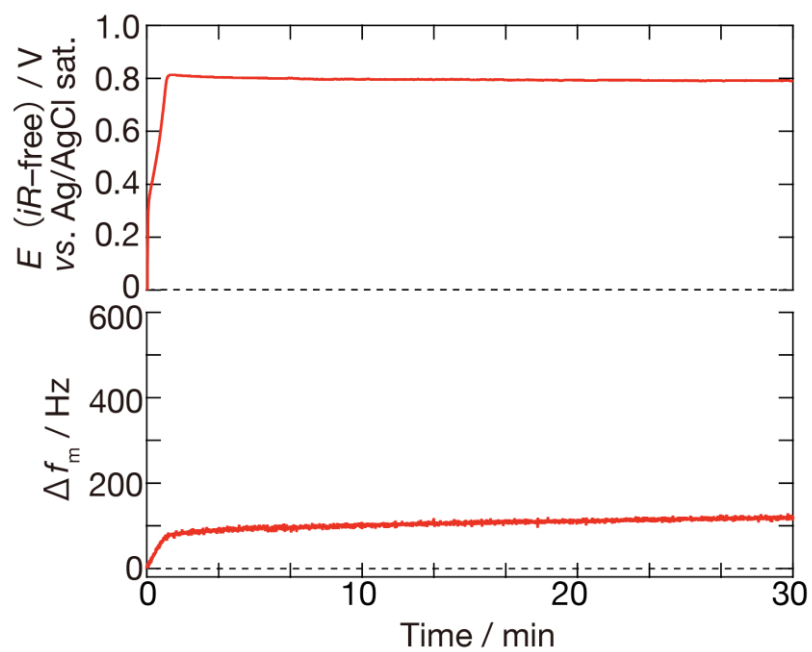

**Figure S3.** EQCM data obtained from a QCM-type 304 SS electrode at room temperature under a constant current of  $100 \mu\text{A cm}^{-2}$  in 1 M  $\text{K}_2\text{HPO}_4$  (pH11.5). The voltammogram and change in frequency are presented.

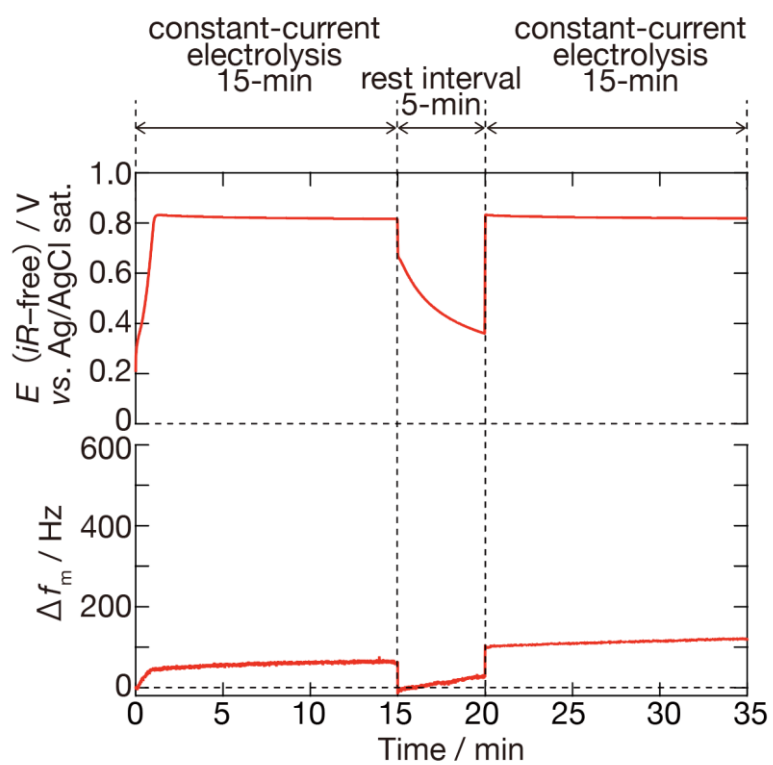

**Figure S4.** EQCM data obtained from the 304 SS electrode at room temperature during constant-current electrolysis at  $10 \mu\text{A cm}^{-2}$  in 1 M  $\text{K}_2\text{HPO}_4$  (pH 11.5). This trial included a 5 min rest interval between two electrolysis steps. The data indicate that the potential rapidly returned to 0.8 V upon restarting the electrolysis.

**a**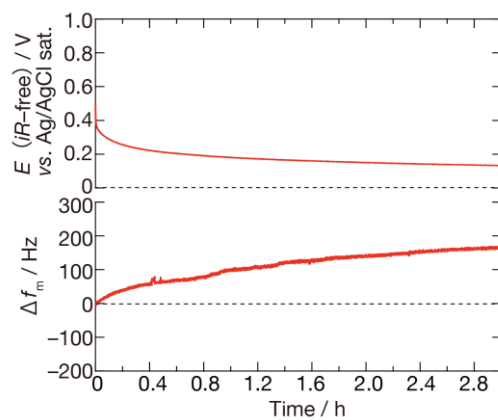**b**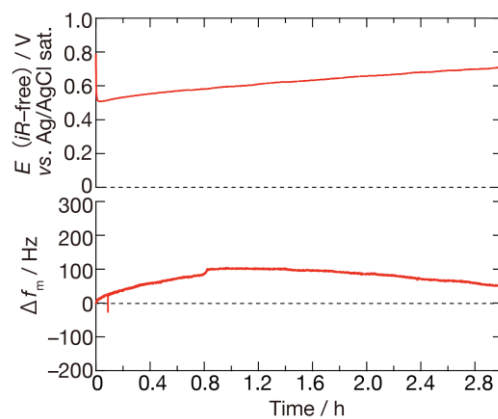

**Figure S5.** EQCM data obtained from a 304 SS electrode at room temperature under potentiostatic electrolysis conditions at (a) 0.4 and (b) 0.8 V in 1 M  $\text{K}_2\text{HPO}_4$  (pH11.5), showing time-dependent changes in frequency.

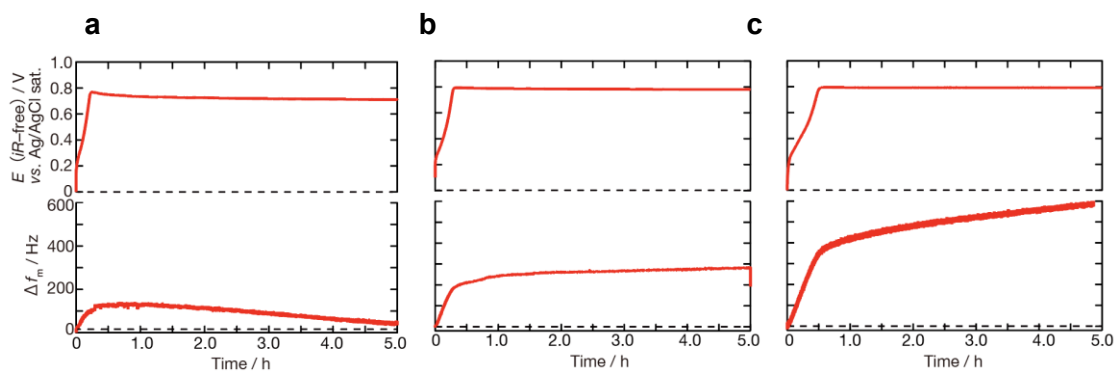

**Figure S6.** EQCM data acquired from a 304 SS electrode at room temperature under a constant current of  $10 \mu\text{A cm}^{-2}$  in (a) 0.2, (b) 1, and (c) 3 M  $\text{K}_2\text{HPO}_4$  solutions. All phosphate electrolytes used in this study were adjusted to pH 11.5.

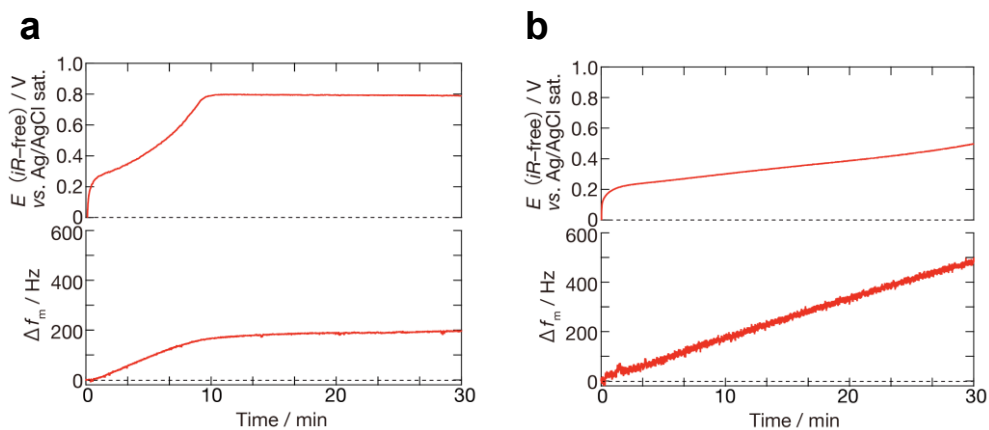

**Figure S7.** EQCM data obtained from a 304 SS electrode at room temperature under a constant current of  $10 \mu\text{A cm}^{-2}$  over a duration of 30 min in (a) 1 and (b) 3 M  $\text{K}_2\text{HPO}_4$  solutions. All phosphate electrolytes used in this study were adjusted to pH 11.5.

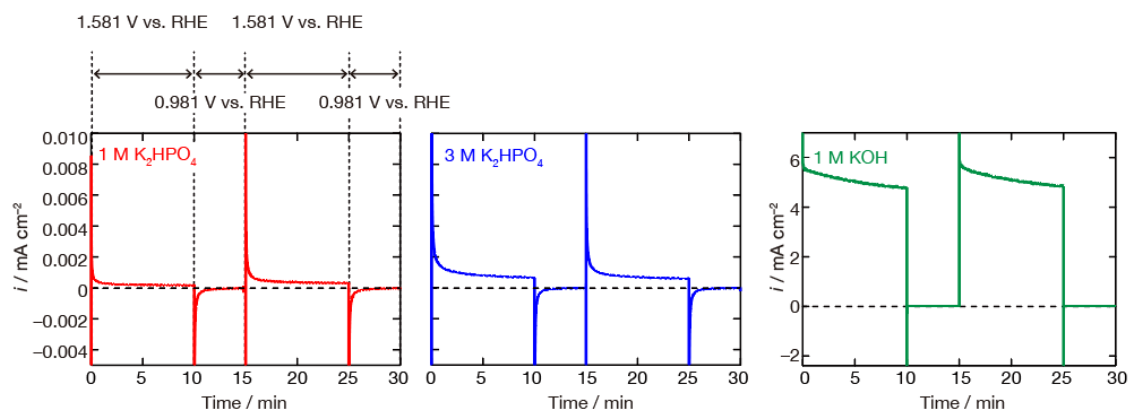

**Figure S8.** Current–time curves obtained from a 304 SS electrode during the twelfth cycle of potential steps between  $E = 1.581$  V (10 min) and  $E = 0.981$  V (5 min) in 1 M  $\text{K}_2\text{HPO}_4$  (red), 3 M  $\text{K}_2\text{HPO}_4$  (blue), and 1 M KOH (green) electrolytes. The details of this oxidation process are provided in the Experimental section.

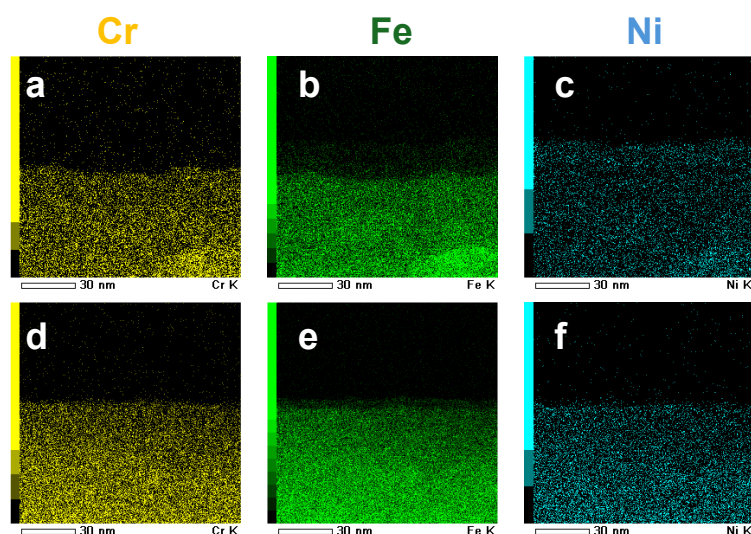

**Figure S9.** Cross-sectional EDX mapping images of a bulk 304 SS sheet electrode surface oxidized under previously reported conditions<sup>[2,3]</sup> in (a, b, c) 1 M KOH and (d, e, f) 1 M  $\text{K}_2\text{HPO}_4$  solutions (pH 11.5). Panels (a, d), (b, e), and (c, f) show the distributions of Cr, Fe, and Ni, respectively.

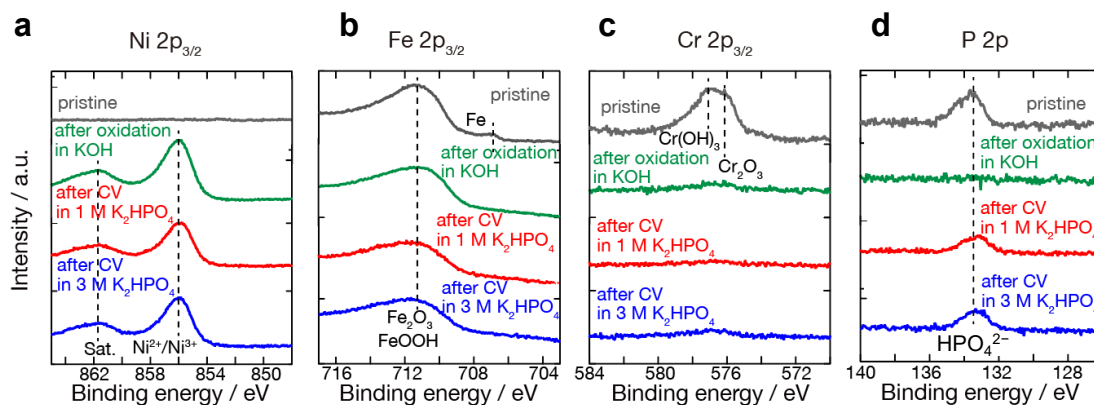

**Figure S10** (a) Ni 2p, (b) Fe 2p, (c) Cr 2p, and (d) P 2p XPS data acquired from pristine 304 SS (gray), KOH-pretreated 304 SS (green), and KOH-pretreated 304 SS after CV in 1 M  $K_2HPO_4$  (blue) and 3 M  $K_2HPO_4$  (red) solutions.

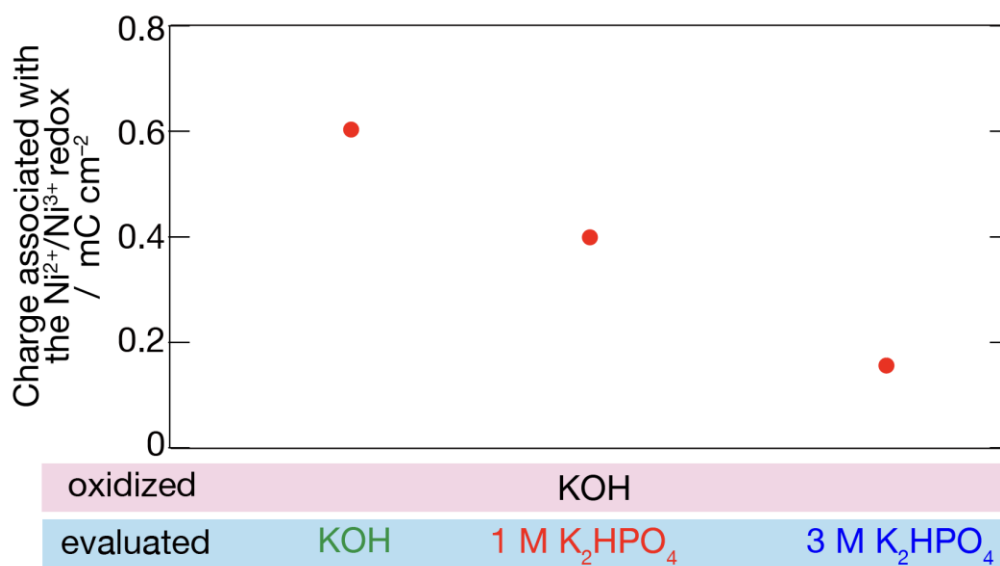

**Figure S11** Charge capacity values for the Ni<sup>3+</sup>/Ni<sup>2+</sup> redox couple as determined from the cathodic peaks in CV data for the eleventh cycle. Electrodes were pretreated in 1 M KOH and subsequently evaluated in 1 M KOH, 1 M K<sub>2</sub>HPO<sub>4</sub> or 3 M K<sub>2</sub>HPO<sub>4</sub> solutions.

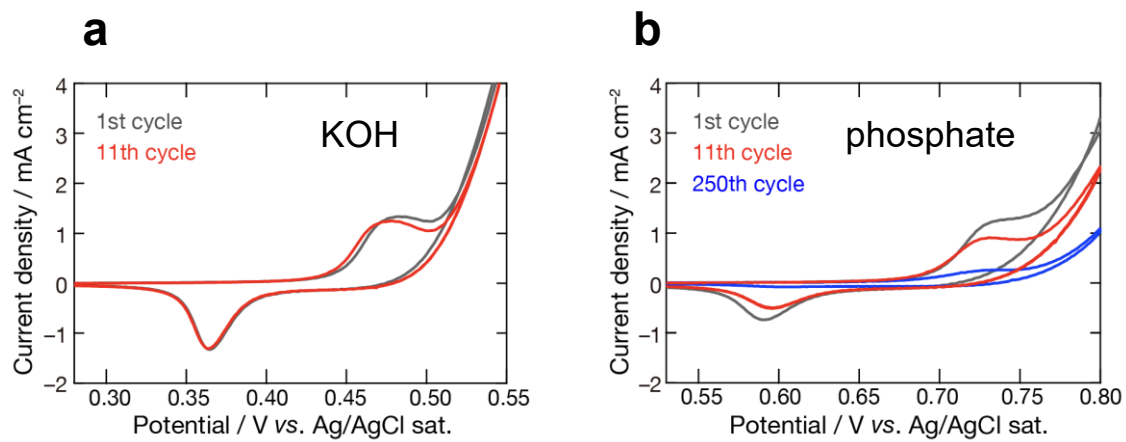

**Figure S12.** Cyclic voltammograms acquired at a scan rate of  $50 \text{ mV s}^{-1}$  to evaluate the  $\text{Ni}^{3+}/\text{Ni}^{2+}$  redox capacity of a 304 SS electrode in (a) KOH and (b) phosphate electrolytes.

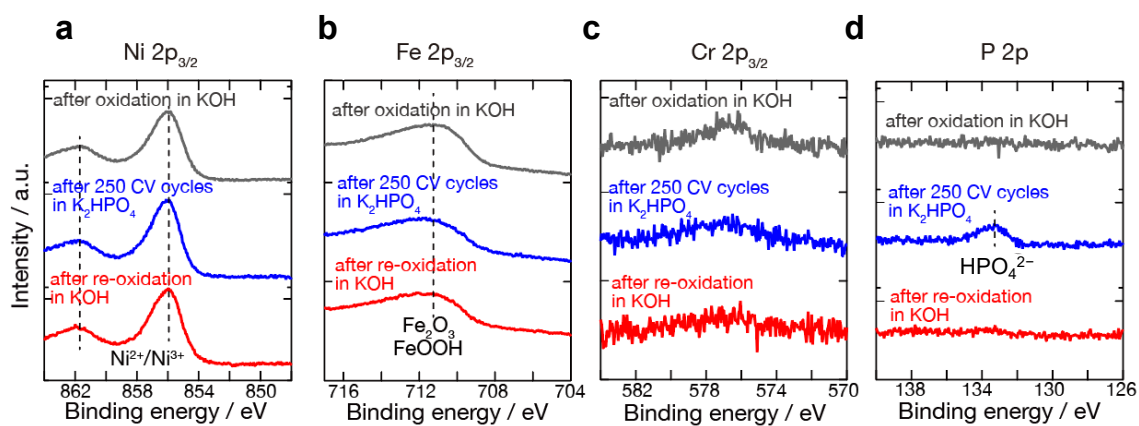

**Figure S13.** (a) Ni 2p, (b) Fe 2p, (c) Cr 2p and (d) P 2p XPS data obtained from a bulk 304 SS sheet electrode after KOH pretreatment (gray), subsequent 250 CV cycles in 1 M  $\text{K}_2\text{HPO}_4$  electrolyte (blue), and subsequent re-oxidation in 1 M KOH (red). These CV trials were carried out at a scan rate of  $50 \text{ mV s}^{-1}$  at room temperature within the potential range of 0.5–0.8 V vs. Ag/AgCl sat. and correspond to Figures 6c–e in the main paper.

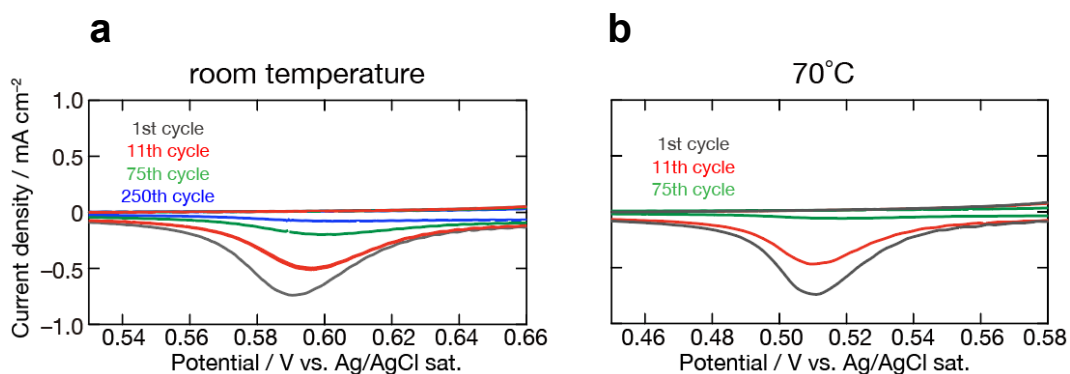

**Figure S14.** Cyclic voltammograms acquired at a scan rate of  $50 \text{ mV s}^{-1}$  to evaluate the  $\text{Ni}^{3+}/\text{Ni}^{2+}$  redox capacity of a 304 SS electrode in a phosphate electrolyte at (a) room temperature and (b)  $70^\circ\text{C}$ .

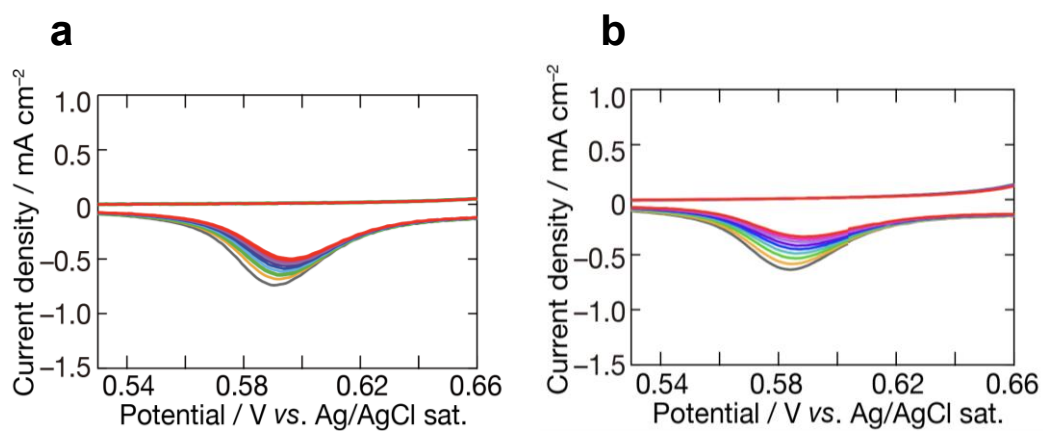

**Figure S15.** Cyclic voltammograms acquired at a scan rate of  $50 \text{ mV s}^{-1}$  to evaluate the  $\text{Ni}^{3+}/\text{Ni}^{2+}$  redox capacity of a 304 SS electrode in (a) 1 and (b) 3 M  $\text{K}_2\text{HPO}_4$  solutions.

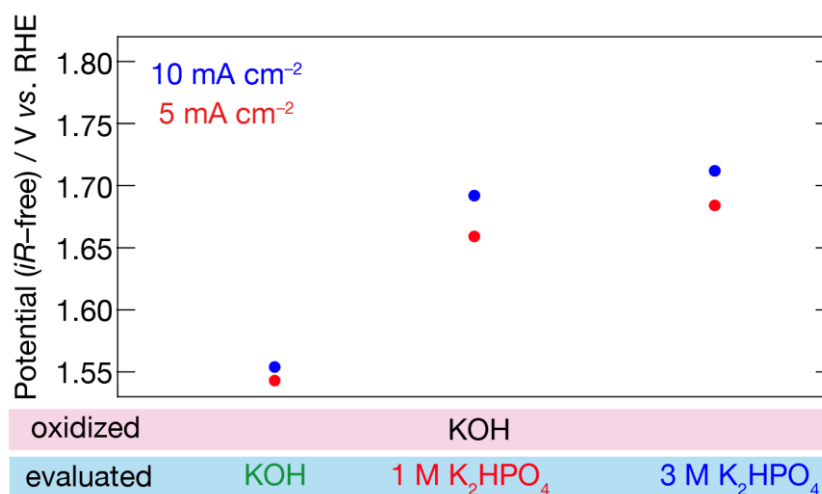

**Figure S16.** iR-free potentials of bulk 304 SS sheet electrodes at current densities of 5 and 10 mA cm<sup>-2</sup> as determined from the cathodic peaks in the data obtained from the eleventh CV cycle. The electrodes were pretreated in 1 M KOH and subsequently evaluated for OER activity in 1 M KOH, 1 M K<sub>2</sub>HPO<sub>4</sub> or 3 M K<sub>2</sub>HPO<sub>4</sub>.

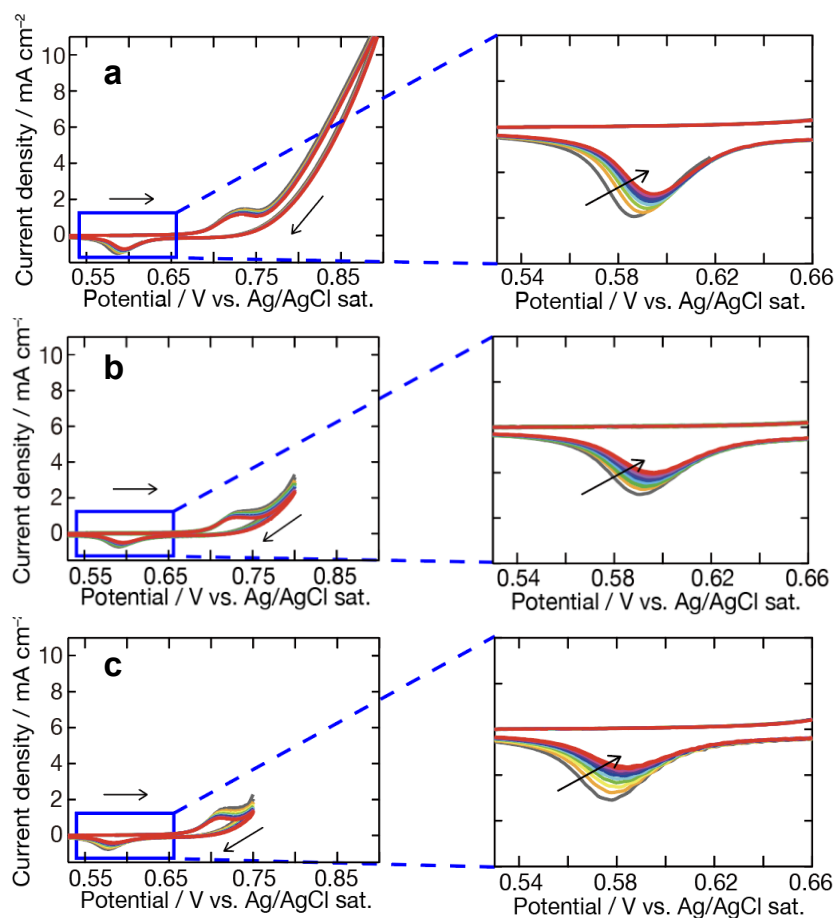

**Figure S17.** Cyclic voltammograms acquired at a scan rate of  $50 \text{ mV s}^{-1}$  to evaluate the  $\text{Ni}^{3+}/\text{Ni}^{2+}$  redox capacity of a 304 SS electrode in a phosphate electrolyte, using the potential regions (a) 0.4–0.9 V, (b) 0.4–0.8 V, and (c) 0.4–0.75 V vs. Ag/AgCl sat. The rightmost panels in each case show enlarged views of the  $\text{Ni}^{3+}/\text{Ni}^{2+}$  redox region highlighted by blue boxes in the leftmost panels.

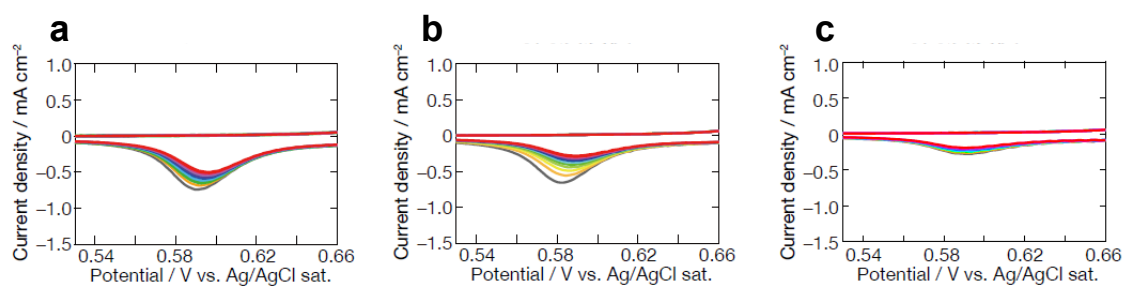

**Figure S18.** Cyclic voltammograms acquired at a scan rate of  $50 \text{ mV s}^{-1}$  to evaluate the  $\text{Ni}^{3+}/\text{Ni}^{2+}$  redox capacity of the 304 SS electrode in a phosphate electrolyte, generated following immersion in the electrolyte at the open-circuit potential for (a) 0 h (immediately after immersion), (b) 2 h, and (c) 8 h.

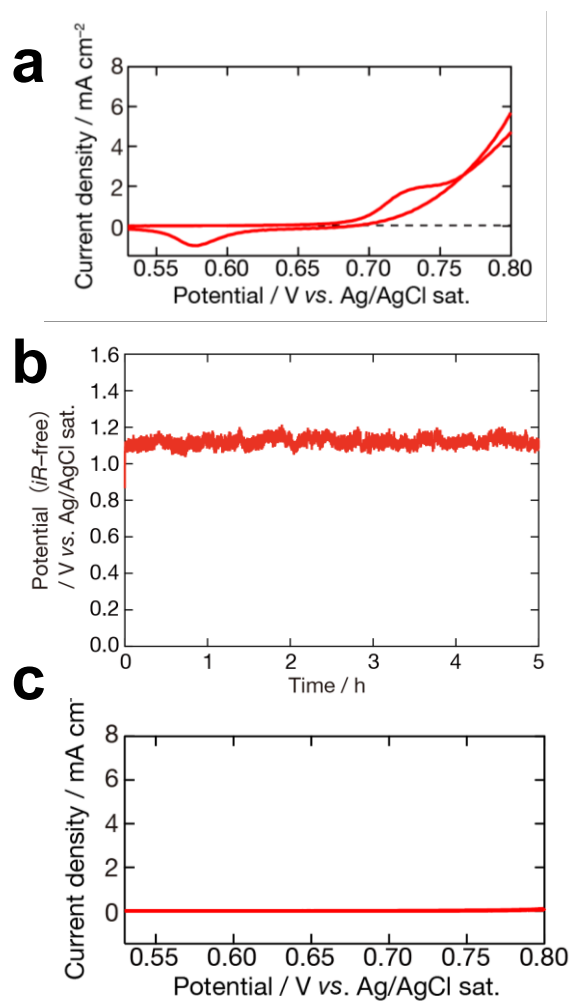

**Figure S19.** (a) Cyclic voltammogram recorded immediately after immersion in the electrolyte at a scan rate of  $50 \text{ mV s}^{-1}$ . (b) Potential–time curve recorded during galvanostatic electrolysis in  $1 \text{ M K}_2\text{HPO}_4$  at  $50 \text{ mA cm}^{-2}$  over a duration of 5 h. (c) Cyclic voltammogram recorded at a scan rate of  $50 \text{ mV s}^{-1}$  following the galvanostatic electrolysis.

### References

- [1] R. GILLIAM, J. GRAYDON, D. KIRK, S. THORPE, *Int. J. Hydrogen Energy* **2007**, *32*, 359–364.
- [2] F. Moureaux, P. Stevens, G. Toussaint, M. Chatenet, *Appl. Catal. B Environ.* **2019**, *258*, 117963.
- [3] L. Magnier, G. Cossard, V. Martin, C. Pascal, V. Roche, E. Sibert, I. Shchedrina, R. Bousquet, V. Parry, M. Chatenet, *Nat. Mater.* **2024**, *23*, 252–261.
